# Supplementary material for: Cardiomyocytes Derived from Human CardiopoieticAmniotic Fluids
Source: PubMed Central journal article supplement (PMC6089907; doi:10.1038/s41598-018-30537-z), 2018-08-13

## Cardiomyocytes Derived from Human <sup>Cardiopoietic</sup> Amniotic Fluids

Angela Di Baldassarre<sup>1</sup>, Maria A D'Amico<sup>1</sup>, Pascal Izzicupo<sup>1</sup>, Giulia Gaggi<sup>1</sup>, Simone Guarnieri<sup>2</sup>, Maria A Marigliò<sup>2</sup>, Ivana Antonucci<sup>3</sup>, Barbara Corneo<sup>4</sup>, Dario Sirabella<sup>4</sup>, Liborio Suppia<sup>3</sup> and Barbara Ghinassi<sup>1\*</sup>

<sup>1</sup>Department of Medicine and Aging Sciences, University "G. d'Annunzio" of Chieti-Pescara, Via dei Vestini 31, 66100, Chieti, Italy

<sup>2</sup>Department of Neuroscience, Imaging e Clinical Sciences, University "G. d'Annunzio" of Chieti-Pescara, Via dei Vestini 31, 66100, Chieti, Italy

<sup>3</sup>Department of Department of Psychological, Humanities and Territorial Sciences, University "G. d'Annunzio" of Chieti-Pescara, Via dei Vestini 31, 66100, Chieti, Italy

<sup>4</sup>Stem Cell Core Facility, Columbia University Medical Center, 650 W. 168<sup>th</sup> St., 10032 New York, NY, USA

Supplementary Table S1. Phenotypic characterization of hAF cells samples

| AF Sample | CD29 | CD73 | CD44 | CD34 | CD45 | CD31 | Tra1-60 | SSEA4 | OCT4 | CD90 |
|-----------|------|------|------|------|------|------|---------|-------|------|------|
| #1        | ++   | ++   | ++   | -    | -    | -    | -/+     | ++    | ++   | ++   |
| #2        | ++   | ++   | ++   | -    | -    | -    | -       | -/+   | -/+  | ++   |
| #3        | ++   | ++   | ++   | -    | -    | -    | -       | -/+   | -/+  | -/+  |
| #4        | ++   | ++   | ++   | -    | -    | -    | -       | ++    | +    | ++   |
| #5        | ++   | ++   | ++   | -    | -    | -    | -       | ++    | ++   | +    |
| #6        | ++   | ++   | ++   | -    | -    | -    | -       | -     | -/+  | -    |
| #7        | ++   | ++   | ++   | -    | -    | -    | -       | -/+   | -/+  | +    |
| #8        | ++   | ++   | ++   | -    | -    | -    | -       | -/+   | -/+  | +    |
| #9        | ++   | ++   | ++   | -    | -    | -    | -       | ++    | +    | ++   |
| #10       | ++   | ++   | ++   | -    | -    | -    | -       | ++    | ++   | +    |
| #11       | ++   | ++   | ++   | -    | -    | -    | -       | +     | -    | -/+  |
| #12       | ++   | ++   | ++   | -    | -    | -    | -       | -/+   | -/+  | ++   |
| #13       | ++   | ++   | ++   | -    | -    | -    | -       | -/+   | -/+  | -/+  |
| #14       | ++   | ++   | ++   | -    | -    | -    | -       | ++    | +    | ++   |
| #15       | ++   | ++   | ++   | -    | -    | -    | -/+     | ++    | ++   | ++   |

Legend: - (<1%) not expressed; -/+ (1-10%) slightly expressed; +(10-50%) expressed; ++ (>50%) strongly expressed

Supplemental Figure S1: Normal diploid male Caryotype (46, XY). The figure is rappresentative of all 15 samples.

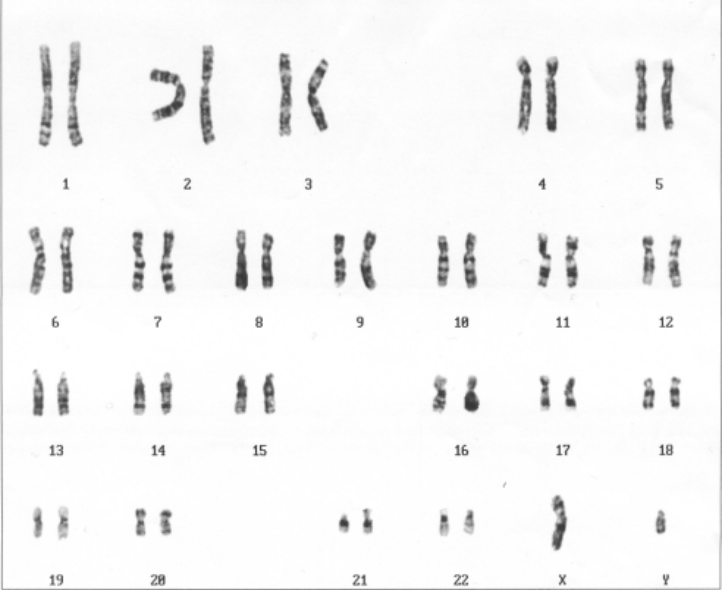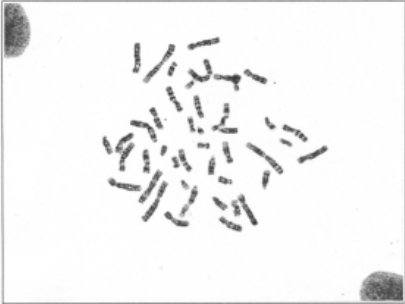

Supplemental Figure S2: Densitometry of the Western Blot analyses. Data are expressed as the mean $\pm$ SD of the optical density percentage relative to the positive control (heart lysate). \* indicates value of CM-like cells statistically different ( $p < 0.05$ ) from *Cardiopoietic* AF cells.

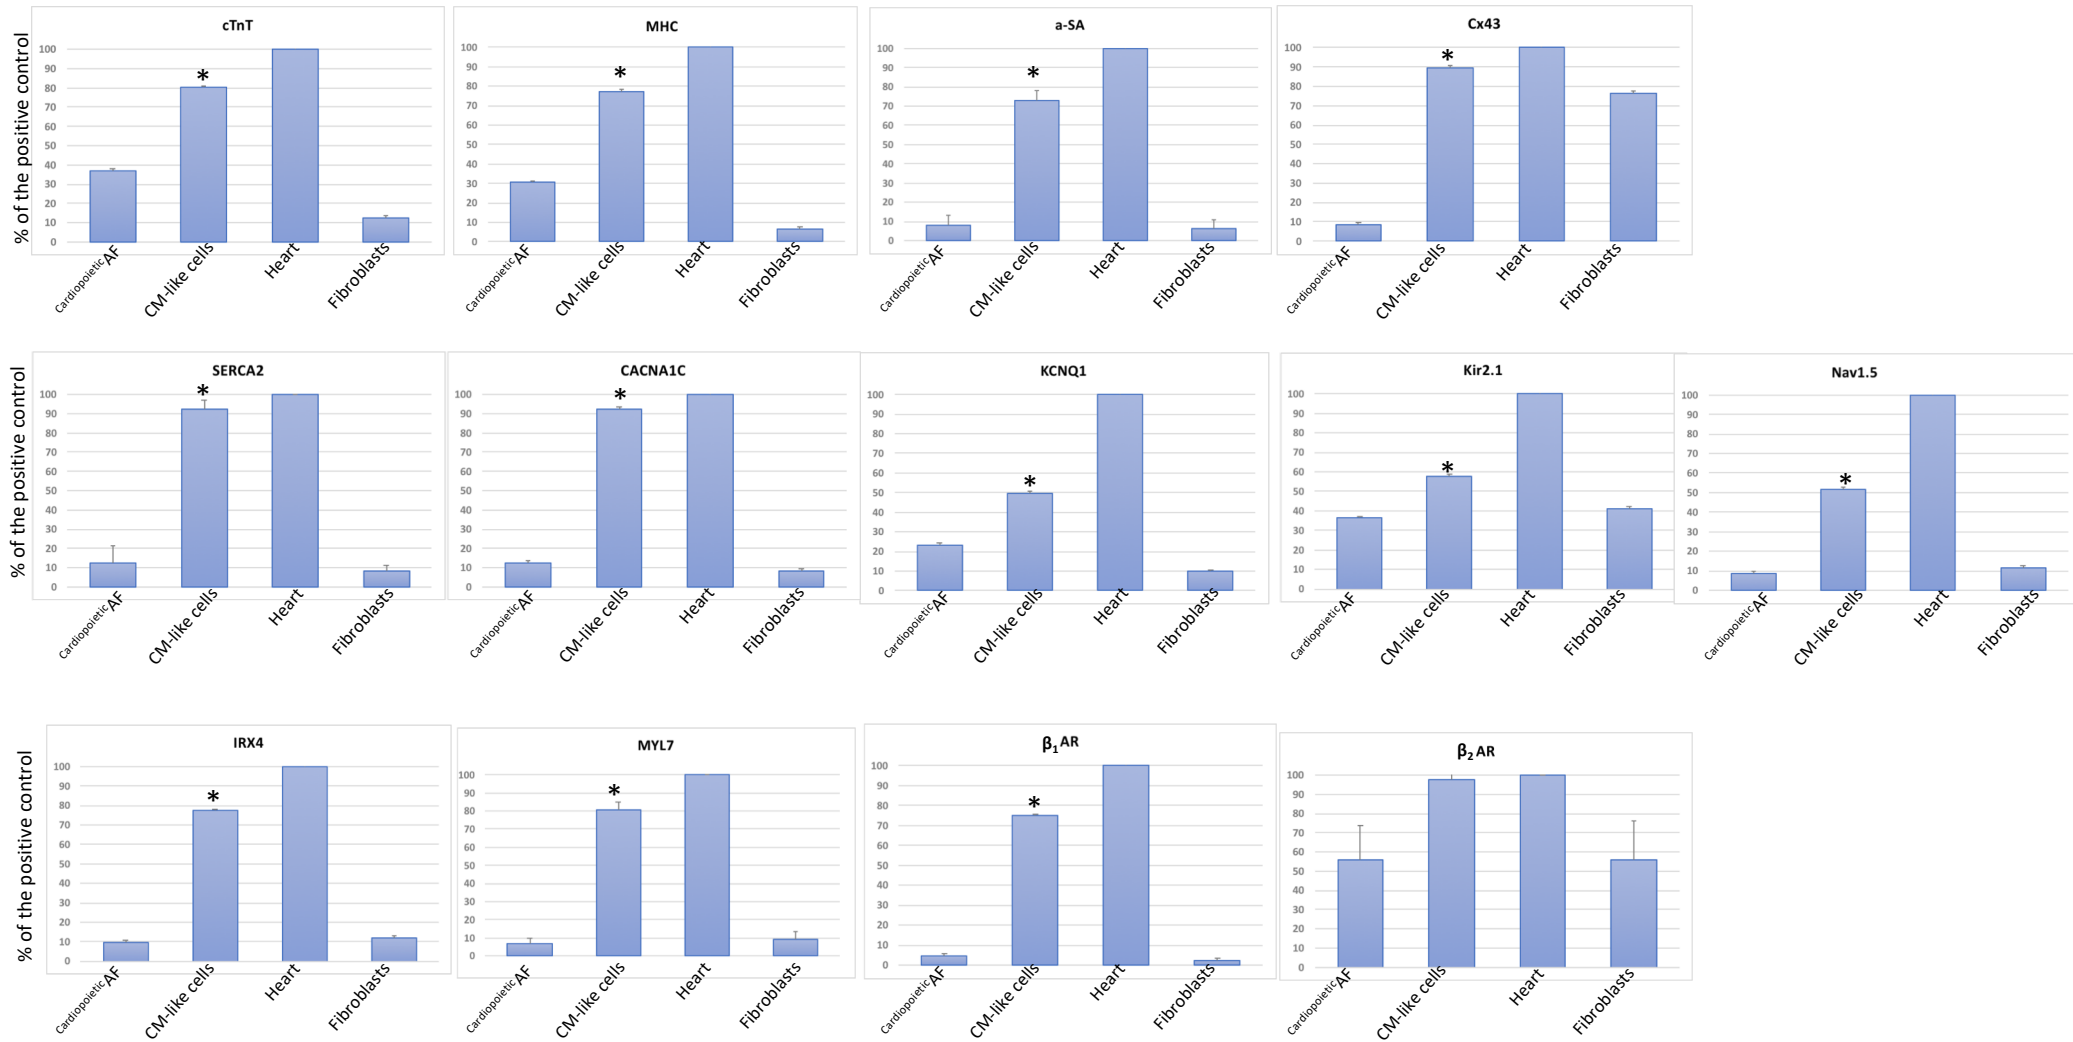

Supplement: 41598_2018_30537_MOESM1_ESM.pdf [file 41598_2018_30537_MOESM1_ESM.pdf]
